# Supplementary material
Source: Elsevier journal article supplement (https://www.sciencedirect.com/science/article/pii/S2387020619300270)

Figure 1: Study flow diagram

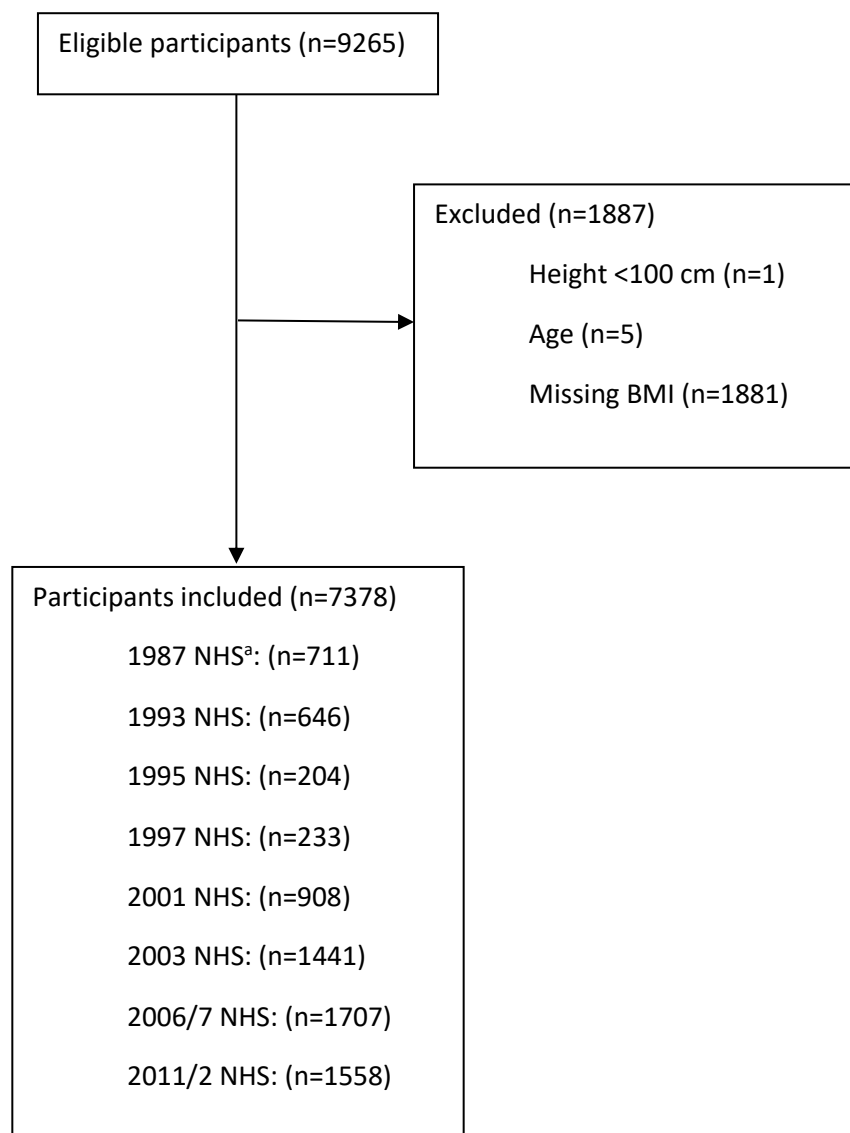

<sup>a</sup> NHS: National Health Survey

Figure 2: Age-adjusted prevalence (%) of obesity and 95% confidence intervals in Spanish adults ( $\geq 16$  years) with diabetes.

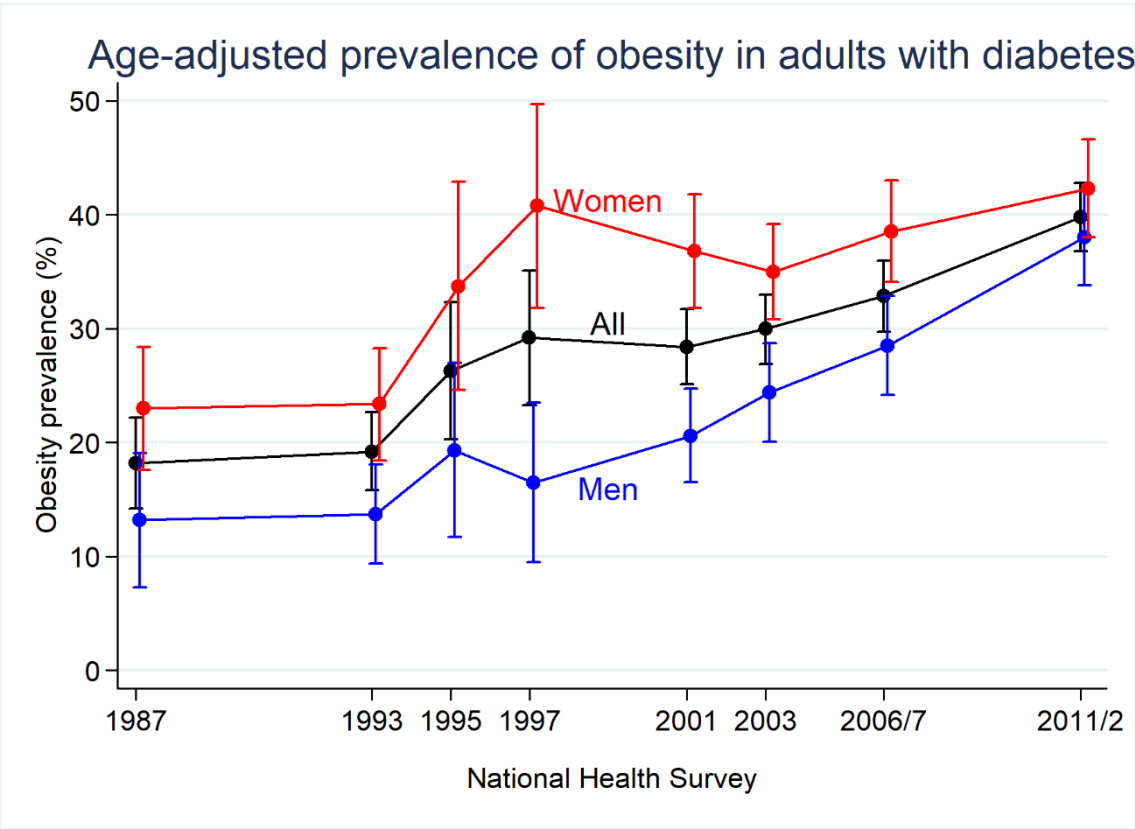

Supplement: mmc1 [file S2387020619300270:mmc1.pdf]
